# Supplementary material for: The association between different domains of quality of life and symptoms in primary care patients with emotional disorders
Source: Sci Rep. 2018 Jul 25;8:11180. doi: 10.1038/s41598-018-28995-6 (PMC6060102; doi:10.1038/s41598-018-28995-6)
Supplement: Supplementary file 1 — Supplementary Material [file 41598_2018_28995_MOESM1_ESM.pdf]

**The association between different domains of quality of life and symptoms in  
primary care patients with emotional disorders**

César González-Blanch<sup>1,2</sup>  
Fernando Hernández de Hita<sup>1</sup>  
Roger Muñoz-Navarro<sup>3</sup>  
Paloma Ruíz-Rodríguez<sup>4</sup>  
Leonardo Adrián Medrano<sup>5</sup>  
Antonio Cano-Vindel<sup>6</sup>

<sup>1</sup>Mental Health Centre, University Hospital “Marqués de Valdecilla”- IDIVAL.  
Santander, Spain.

<sup>2</sup>Faculty of Health Sciences, Universidad Europea del Atlántico, Santander, Spain

<sup>3</sup>Department of Basic Psychology, Faculty of Psychology, University of Valencia,  
Valencia, Spain

<sup>4</sup>Castilla La Nueva Primary Care Centre, Health Service of Madrid, Madrid, Spain

<sup>5</sup>Faculty of Psychology, University Siglo 21, Córdoba, Argentina

<sup>6</sup>Department of Basic Psychology, Faculty of Psychology, University Complutense of  
Madrid, Madrid, Spain

**Table S1.** Correlation matrix of symptoms intensity and QoL domains

| <b>QoL (WHOQOL-Bref)</b> | <b>Depression (PHQ-9)</b> | <b>Anxiety (GAD-7)</b> | <b>Somatizations (PHQ-15)</b> |
|--------------------------|---------------------------|------------------------|-------------------------------|
| Psychological            | -.600 <sup>a</sup>        | -.477 <sup>a</sup>     | -.558 <sup>a</sup>            |
| Physical                 | -.668 <sup>a</sup>        | -.510 <sup>a</sup>     | -.419 <sup>a</sup>            |
| Social relations         | -.400 <sup>a</sup>        | -.241 <sup>a</sup>     | -.201 <sup>a</sup>            |
| Environmental            | -.384 <sup>a</sup>        | -.336 <sup>a</sup>     | -.302 <sup>a</sup>            |
| Overall                  | -.420 <sup>a</sup>        | -.301 <sup>a</sup>     | -.267 <sup>a</sup>            |

<sup>a</sup> Correlation is significant at the 0.01 level.

QoL, Quality of Life; WHOQOL-Bref , World Health Organization Quality of Life Instrument-Short Form; PHQ-9, Patient Health Questionnaire-9; GAD-7, Generalized Anxiety Disorder 7; PHQ-15, Patient Health Questionnaire-15.

**Table S2.** Covariate Adjusted Means (standard errors) of QoL as a function of the number of mental disorder diagnoses<sup>b</sup>

|                                       | Number of diagnoses    |                |                |                |
|---------------------------------------|------------------------|----------------|----------------|----------------|
|                                       | <b>0</b>               | <b>1</b>       | <b>2</b>       | <b>3</b>       |
|                                       | (n= 195)               | (n= 261)       | (n= 299)       | (n= 486)       |
|                                       | Mean (SE) <sup>b</sup> | Mean (SE)      | Mean (SE)      | Mean (SE)      |
| <b>QoL (WHOQOL-Bref )<sup>c</sup></b> |                        |                |                |                |
| Psychological (0-100)                 | 70.65 (0.99)           | 59.88 (0.85)** | 54.44 (0.79)** | 44.61 (0.63)** |
| Physical (0-100)                      | 58.57 (1.05)           | 52.76 (0.90)** | 45.18 (0.84)** | 34.93 (0.67)** |
| Social relations (0-100)              | 60.47 (1.44)           | 54.53 (1.23)*  | 50.09 (1.15)   | 43.49 (0.91)** |
| Environmental (0-100)                 | 63.88 (0.98)           | 59.74 (0.84)*  | 55.91 (0.78)*  | 51.27 (0.62)** |
| Overall (0-4)                         | 3.34 (0.06)            | 3.10 (0.05)*   | 2.89 (0.05)*   | 2.58 (0.04)**  |

\*p<.01; \*\*p<.001

WHOQOL-Bref , World Health Organization Quality of Life Instrument-Short Form; QoL, Quality of Life

<sup>a</sup> Means after controlling for covariates (age, sex, education, marital status, employment status, and income).

<sup>b</sup> Significance in the column '1 diagnosis' refer to the difference with 'no diagnosis', in the '2 diagnoses' column, to the difference between 2 diagnoses and 1 diagnosis, and in the '3 diagnoses' column to the difference between 3 diagnoses and 2 diagnoses. Diagnoses based on algorithms from the PHQ-9, GAD-7 and PHQ-15 for major depression, generalized anxiety and somatoform disorders, respectively.

<sup>b</sup> SE- standard errors based on 1000 bootstrap samples.

<sup>c</sup> in parenthesis overall score range of each subscale.
